# Supplementary material for: Lineage-specific CDK activity dynamics characterize early mammalian development
Source: PubMed Central journal article supplement — bioRxiv. 2024 Jun 14:2024.06.14.599098. Preprint. [Version 1] doi: 10.1101/2024.06.14.599098 (PMC11451597; doi:10.1101/2024.06.14.599098), 2024-06-14
Supplement: NIHPP2024.06.14.599098v1-supplement-2.pdf [file NIHPP2024.06.14.599098v1-supplement-2.pdf]

**Supplementary Table 1**

|                                               |                                             |                                              |
|-----------------------------------------------|---------------------------------------------|----------------------------------------------|
| <b>Primers (qRT-PCR)</b>                      |                                             |                                              |
| p57 <sup>KIP2</sup>                           | TGTAGCAGGAACCGGAGATG                        | AGCTTTACACCTTGGGACCA                         |
| GAPDH                                         | TTCACCACCATGGAGAAGGC                        | CCCTTTTGGCTCCACCCT                           |
| <b>Primers (Genotyping)</b>                   |                                             |                                              |
| <b>pVector-CDK1-FKBP-2A-TagBFP Construct</b>  |                                             |                                              |
|                                               | forward                                     | reverse                                      |
| CDK1-5' (CLONING CDK1 UPSTREAM SEQUENCES)     | GGAGCTCAAACCTGCCCCAGTTGGAGACCACT GGATTATTG  | CTGCTCCCCCATCTTCTTAATCTGATTGTCC AAGTCATCAAAG |
| FKBP                                          | CAGATTAAGAAGATGGGGGGAGCAGGAGGC GTCGACGGTATC | GGACCCGCCGCTGCATAGTCCGGGACATC ATACGG         |
| 2A_TagBFP                                     | GGACTATGCAGGCGGCGGGTCCGGAGGAGA GGGCAG       | CATCCATCCAGAGGGTCAATTAAGCTTGTGC CCCAGTTTGC   |
| DUXBL-3' (CLONING DUXBL DOWNSTREAM SEQUENCES) | GCTTAATTGACCCTCTGGATGGATGTCCCTG TCTGCTGG    | GCAAAAAACAGTTTTCAGGCTGCTTCTAAGAA TTACACTAAGC |
| VECTOR-F                                      | CACCGAGACAGGGACATCCATCCAG                   | AAACCTGGATGGATGTCCCTGTCTC                    |
|                                               |                                             |                                              |
| <b>Primers (Genotyping)</b>                   |                                             |                                              |
|                                               | forward                                     | reverse                                      |
| WT ROSA26                                     | GCAAGCACGTTTCCGACTTG                        | CCTCGATGGAAAATACTCCG                         |
| DHB-H2B_ROSA26                                | AAGGGCATCGACTTCAAGGA                        | GTCTGCCTTCTCCTCACCT                          |
|                                               |                                             |                                              |
| <b>Primers (CRISPR targeting)</b>             |                                             |                                              |
|                                               | forward                                     | reverse                                      |
| pLentiCRISPRV2_mouseCDK1-1                    | CACCGAGACAGGGACATCCATCCAG                   | AAACCTGGATGGATGTCCCTGTCTC                    |
| pLentiCRISPRV2_mouseCDK1-2                    | CACCGTCCCCTACGACCAGCAGACA                   | AAACTGTCTGCTGGTCGTAGGGGAC                    |
| pLentiCRISPRV2_mouseCDK2-1                    | CACCGAAAGGTGGAGAAGATTGGAG                   | AAACCTCCAATCTTCTCCACCTTTC                    |
| pLentiCRISPRV2_mouseCDK2-2                    | CACCGTGGAGAGGGCAGTACGGAG                    | AAACCTCCGTACGTGCCCTCTCCAC                    |
| pLentiCRISPRV2_mouseCDK2-3                    | CACCGAGGCATCCATGAATTTCTTG                   | AAACCAAGAAATTCATGGATGCCTC                    |
| pLentiCRISPRV2_humanCDK2-1                    | CACCGAATGTGCGACTACAGACTCG                   | AAACCGAGTCTGTAGTCGCACATTC                    |
| pLentiCRISPRV2_humanCDK2-2                    | CACCGTCAACCTAGCAACTCAGGT                    | AAACACCTGAGTTGCTAGGTTGAC                     |
